# Supplementary material for: Measurements of hydroperoxy radicals (HO 2 ) at atmospheric concentrations using bromide chemical ionisation mass spectrometry
Source: Copernicus journal article supplement (doi:10.5194/amt-12-891-2019), 2019-02-08
Supplement: Supplementary file 1 [file amt-12-891-2019-supplement.pdf]

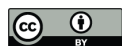

*Supplement of*

## **Measurements of hydroperoxy radicals ( $\text{HO}_2$ ) at atmospheric concentrations using bromide chemical ionisation mass spectrometry**

**Sascha R. Albrecht et al.**

*Correspondence to:* Sascha R. Albrecht ([s.albrecht@fz-juelich.de](mailto:s.albrecht@fz-juelich.de))

The copyright of individual parts of the supplement might differ from the CC BY 4.0 License.

## Supplementary Information 1 Experimental parameters

| day            | H <sub>2</sub> O | O <sub>3</sub> | VOC                           | VOC conc.          | NO        | NO <sub>2</sub> | CO        |
|----------------|------------------|----------------|-------------------------------|--------------------|-----------|-----------------|-----------|
| <b>29 May</b>  | 1.8 %            | 140 ppbv       | cis-IEPOX                     | 3.2 ppbv           | 0.06 ppbv | 1.2 ppbv        | 0.03 ppmv |
| <b>31 May</b>  | 1.6 %            | 50 ppbv        | isoprene                      | 5 ppbv             | 3.0 ppbv  | 3.2 ppbv        | 0.05 ppmv |
| <b>01 June</b> | 1.6 %            | 140 ppbv       | trans-IEPOX                   | 1.7 ppbv           | 0.05 ppbv | 1.0 ppbv        | 0.03 ppmv |
| <b>02 June</b> | 1.7 %            | 30 ppbv        | cis-IEPOX                     | 4.3 ppbv           | 3.0 ppbv  | 1.8 ppbv        | 0.06 ppmv |
| <b>14 June</b> | 1.8 %            | 170 ppbv       | 1,2-ISOPROOH                  | 2.4 ppbv           | 0.06 ppbv | 1.3 ppbv        | 0.02 ppmv |
| <b>15 June</b> | 2.1 %            | 190 ppbv       | 1,2-ISOPROOH                  | 0.7 ppbv           | 0.04 ppbv | 1.0 ppbv        | 0.03 ppmv |
| <b>19 June</b> | 1.9 %            | 70 ppbv        | none                          |                    | 0.14 ppbv | 2.1 ppbv        | 0.9 ppmv  |
| <b>20 June</b> | 1.9 %            | 160 ppbv       | 1,2-ISOPROOH                  | 1.9 ppbv           | 0.04 ppbv | 1.2 ppbv        | 0.04 ppmv |
| <b>21 June</b> | 0.03 %           | 170 ppbv       | 1,2-ISOPROOH,<br>4,3-ISOPROOH | 6.5 ppbv<br>1 ppbv | 0.01 ppbv | 0.4 ppbv        | 0.15 ppmv |
| <b>22 June</b> | 2.0 %            | 170 ppbv       | 4,3-ISOPROOH                  | 9 ppbv             | 0.04 ppbv | 1.0 ppbv        | 0.1 ppmv  |
| <b>24 June</b> | 1.4 %            | 160 ppbv       | none                          |                    | 0.06 ppbv | 0.8 ppbv        | 3.0 ppmv  |
| <b>26 June</b> | 1.6 %            | 170 ppbv       | none                          |                    | 0.05 ppbv | 0.9 ppbv        | 0.02 ppmv |

**Table S1.** The maximum concentration of reactants present in the reaction chamber during the experiments used for the correlation plots show in the publication. The VOC concentrations for ISOPROOH and IEPOX are preliminary data and are having an higher uncertainty.

## Supplementary Information 2 IEPOX interference

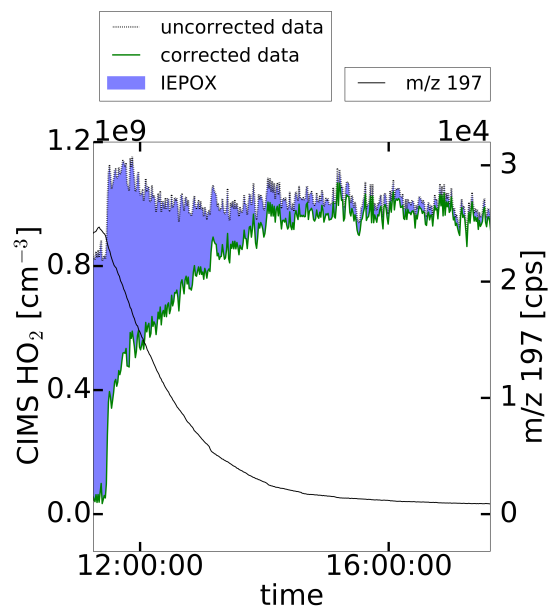

**Figure S1.** The HO<sub>2</sub> concentrations measured by the CIMS on 29 May, the blue shaded area indicates the correction for the IEPOX interference (see text for details). On the right axis the signal for mass 197 is shown, where IEPOX appears as cluster with bromide in the mass spectrum.

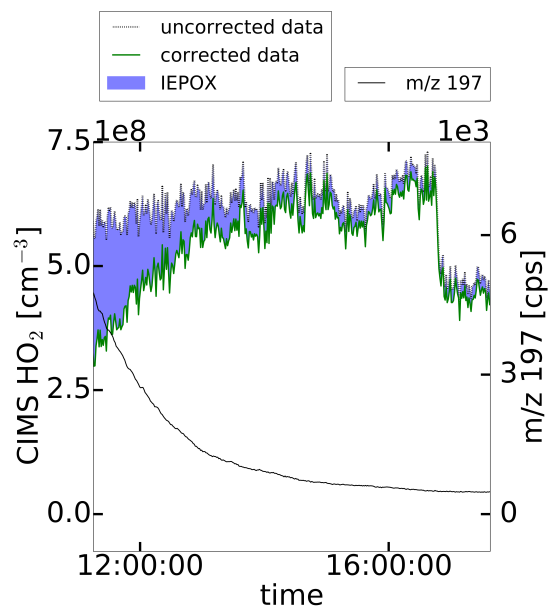

**Figure S2.** The HO<sub>2</sub> concentrations measured by the CIMS on 01 June, the blue shaded area indicates the correction for the IEPOX interference (see text for details). On the right axis the signal for mass 197 is shown, where IEPOX appears as cluster with bromide in the mass spectrum.

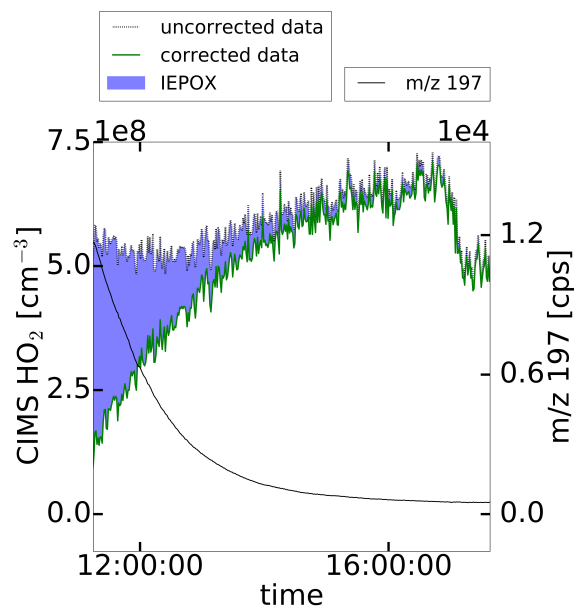

**Figure S3.** The HO<sub>2</sub> concentrations measured by the CIMS on 02 June, the blue shaded area indicates the correction for the IEPOX interference (see text for details). On the right axis the signal for mass 197 is shown, where IEPOX appears as cluster with bromide in the mass spectrum.

### Supplementary Information 3 Ozone experiment

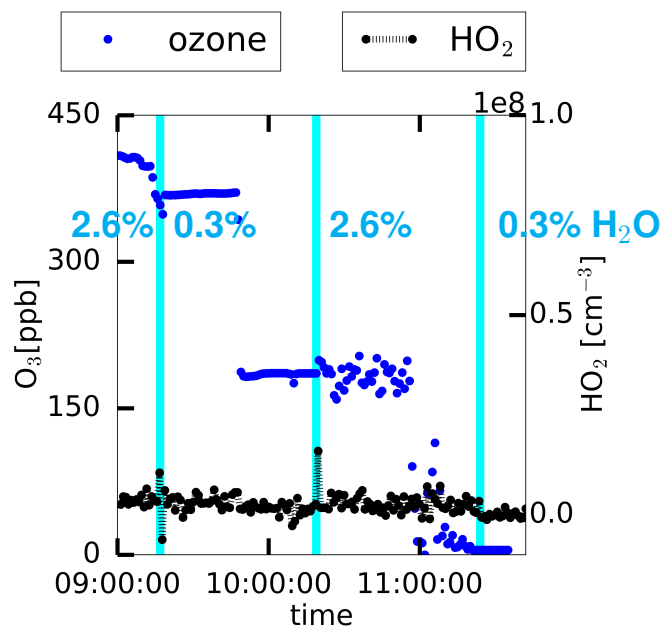

**Figure S4.** The plot shows the ozone concentration (left axis) applied to the inlet as blue dots and the normalized HO<sub>2</sub> signal (right axis) as black dots connected by a dashed line. The cyan lines indicate a change in the water mixing ratio applied. The water mixing ratio has been changed from 2.6% to 0.3% to 2.6% to 0.3%.

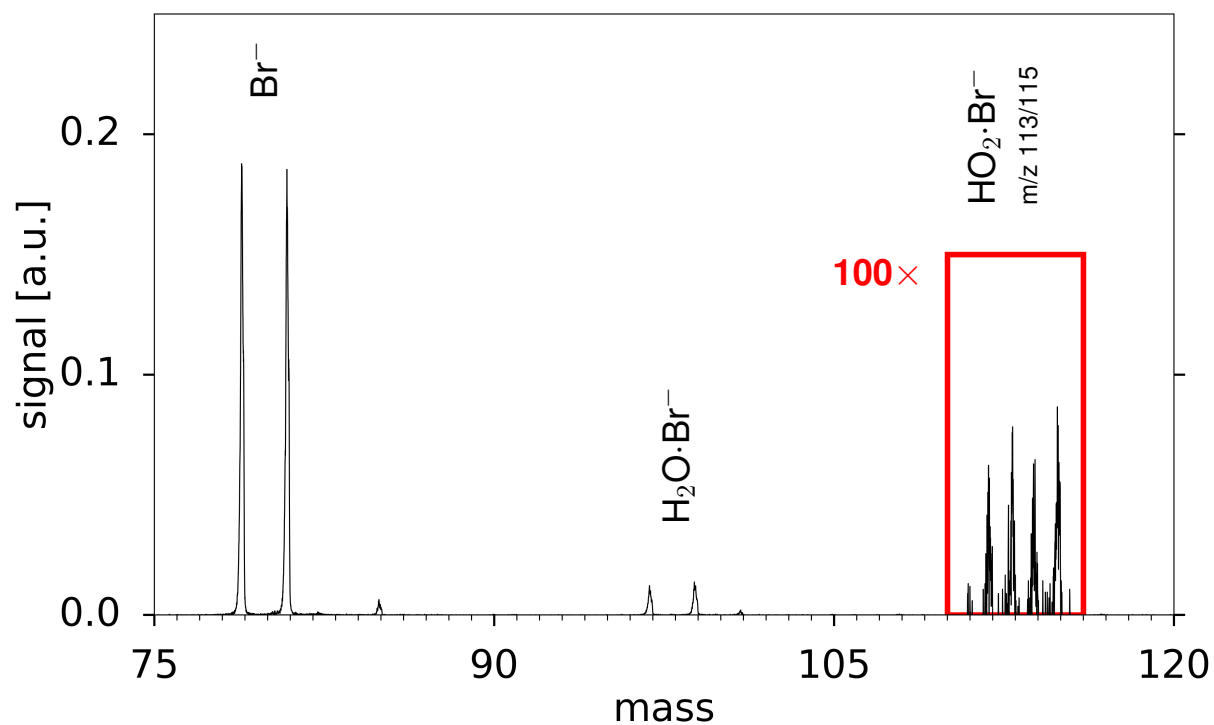

**Figure S5.** A mass spectrum showing a  $\text{HO}_2$  measurement of 21 June, the intensity of masses shown in the red box is multiplied by a factor of 100.
